# Supplementary material
Source: HighWire-hosted journal article supplement (https://www.cmajopen.ca/highwire/filestream/80707/field_highwire_adjunct_files/0/open-2013-0005-original-submission.pdf)
Supplement: open-2013-0005-original-submission.pdf [file open-2013-0005-original-submission.pdf]

**Comparison of Blood Pressure Measurement using an Automated Blood Pressure Device in Community Pharmacies and Physicians' Offices: The Collingwood-Creemore randomized controlled trial**

|                               |                                                                                                                                                                                                                                                                                                                                                                                                                                                                                                                                                                                                                                                                                                                                                                                                                                                                                                                                                                                                                                                                                                                                                                                                                                                                                                                                                                                                                                                                                                                                                                                                                                                                                                                                                                                                                                              |
|-------------------------------|----------------------------------------------------------------------------------------------------------------------------------------------------------------------------------------------------------------------------------------------------------------------------------------------------------------------------------------------------------------------------------------------------------------------------------------------------------------------------------------------------------------------------------------------------------------------------------------------------------------------------------------------------------------------------------------------------------------------------------------------------------------------------------------------------------------------------------------------------------------------------------------------------------------------------------------------------------------------------------------------------------------------------------------------------------------------------------------------------------------------------------------------------------------------------------------------------------------------------------------------------------------------------------------------------------------------------------------------------------------------------------------------------------------------------------------------------------------------------------------------------------------------------------------------------------------------------------------------------------------------------------------------------------------------------------------------------------------------------------------------------------------------------------------------------------------------------------------------|
| Journal:                      | <i>CMAJ Open</i>                                                                                                                                                                                                                                                                                                                                                                                                                                                                                                                                                                                                                                                                                                                                                                                                                                                                                                                                                                                                                                                                                                                                                                                                                                                                                                                                                                                                                                                                                                                                                                                                                                                                                                                                                                                                                             |
| Manuscript ID:                | CMAJOpen-2013-0005.R1                                                                                                                                                                                                                                                                                                                                                                                                                                                                                                                                                                                                                                                                                                                                                                                                                                                                                                                                                                                                                                                                                                                                                                                                                                                                                                                                                                                                                                                                                                                                                                                                                                                                                                                                                                                                                        |
| Manuscript Type:              | Clinical trial (randomized controlled trial)                                                                                                                                                                                                                                                                                                                                                                                                                                                                                                                                                                                                                                                                                                                                                                                                                                                                                                                                                                                                                                                                                                                                                                                                                                                                                                                                                                                                                                                                                                                                                                                                                                                                                                                                                                                                 |
| Date Submitted by the Author: | 08-Mar-2013                                                                                                                                                                                                                                                                                                                                                                                                                                                                                                                                                                                                                                                                                                                                                                                                                                                                                                                                                                                                                                                                                                                                                                                                                                                                                                                                                                                                                                                                                                                                                                                                                                                                                                                                                                                                                                  |
| Complete List of Authors:     | Chambers, Larry; Bruyere Research Institute, Kaczorowski, Janusz; Unviuersity of Montreal, Department of Family and Emergency Medicine and the University of Montreal Hospital Research Centre (CRCHUM) O'Rielly, Susan; Dave Smith Youth Treatment Centre, Ignagni, Sandra; University of British Columbia, Vice President's Office                                                                                                                                                                                                                                                                                                                                                                                                                                                                                                                                                                                                                                                                                                                                                                                                                                                                                                                                                                                                                                                                                                                                                                                                                                                                                                                                                                                                                                                                                                         |
| Keywords:                     | Hypertension, Family medicine, general practice, primary care, Pharmacy, Public health, Statistics and research methods, Geriatric medicine                                                                                                                                                                                                                                                                                                                                                                                                                                                                                                                                                                                                                                                                                                                                                                                                                                                                                                                                                                                                                                                                                                                                                                                                                                                                                                                                                                                                                                                                                                                                                                                                                                                                                                  |
| More Detailed Keywords:       | blood pressure measurement                                                                                                                                                                                                                                                                                                                                                                                                                                                                                                                                                                                                                                                                                                                                                                                                                                                                                                                                                                                                                                                                                                                                                                                                                                                                                                                                                                                                                                                                                                                                                                                                                                                                                                                                                                                                                   |
| Abstract:                     | <p>Background: Automated blood pressure devices in community settings such as pharmacies provide opportunities for additional blood pressure measurement; however, it is important to ensure these measurements are comparable to those taken in the physicians' offices using the same devices. To assess whether blood pressure readings assessed with an automated device differed according to the setting in which they were taken, specifically in community pharmacies compared to physicians' offices, we conducted a randomized controlled trial.</p> <p>Methods: Five family physicians mailed invitations to their patients aged 65 years and older to participate in the trial. Eligible and consenting adults were randomly allocated to one of two blood pressure measurement sequences: A.) physician's office/pharmacy/physician's office or B.) pharmacy/physician's office/pharmacy. Differences in mean Systolic Blood Pressure (SBP) and Diastolic Blood Pressure (DBP) using automated blood pressure measuring device were calculated comparing the setting and sequence of the assessments.</p> <p>Results: 275 adults completed the trial (mean age 75.9 years, 49.5% male and 46.9% with self-reported diagnosis of hypertension). There were no statistically significant differences in SBP or DBP associated with the sequence or the setting. There was a significant difference in the overall mean SBP between the two arms (122.0 versus 127.8 mmHg, <math>p &lt; .001</math>) which was most likely due to a statistical anomaly.</p> <p>Interpretation: Measurements of blood pressure using an automated device in a community pharmacy provide accurate and valid blood pressure information that can be used in the diagnosis and management of hypertension among community-dwelling older adults.</p> |

1  
2  
3  
4  
5  
6  
7  
8  
9  
10  
11  
12  
13  
14  
15  
16  
17  
18  
19  
20  
21  
22  
23  
24  
25  
26  
27  
28  
29  
30  
31  
32  
33  
34  
35  
36  
37  
38  
39  
40  
41  
42  
43  
44  
45  
46  
47  
48  
49  
50  
51  
52  
53  
54  
55  
56  
57  
58  
59  
60

SCHOLARONE™  
Manuscripts

Confidential

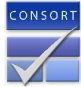

## CONSORT 2010 checklist of information to include when reporting a randomised trial\*

| Section/Topic                    | Item No | Checklist item                                                                                                                                                                              | Reported on page No |
|----------------------------------|---------|---------------------------------------------------------------------------------------------------------------------------------------------------------------------------------------------|---------------------|
| <b>Title and abstract</b>        |         |                                                                                                                                                                                             |                     |
|                                  | 1a      | Identification as a randomised trial in the title                                                                                                                                           | 1                   |
|                                  | 1b      | Structured summary of trial design, methods, results, and conclusions (for specific guidance see CONSORT for abstracts)                                                                     | 2,3                 |
| <b>Introduction</b>              |         |                                                                                                                                                                                             |                     |
| Background and objectives        | 2a      | Scientific background and explanation of rationale                                                                                                                                          | 5                   |
|                                  | 2b      | Specific objectives or hypotheses                                                                                                                                                           | 6                   |
| <b>Methods</b>                   |         |                                                                                                                                                                                             |                     |
| Trial design                     | 3a      | Description of trial design (such as parallel, factorial) including allocation ratio                                                                                                        | 6                   |
|                                  | 3b      | Important changes to methods after trial commencement (such as eligibility criteria), with reasons                                                                                          | 6                   |
| Participants                     | 4a      | Eligibility criteria for participants                                                                                                                                                       | 10                  |
|                                  | 4b      | Settings and locations where the data were collected                                                                                                                                        | 7,8                 |
| Interventions                    | 5       | The interventions for each group with sufficient details to allow replication, including how and when they were actually administered                                                       | 7-11                |
| Outcomes                         | 6a      | Completely defined pre-specified primary and secondary outcome measures, including how and when they were assessed                                                                          | 11                  |
|                                  | 6b      | Any changes to trial outcomes after the trial commenced, with reasons                                                                                                                       | 6                   |
| Sample size                      | 7a      | How sample size was determined                                                                                                                                                              | 12                  |
|                                  | 7b      | When applicable, explanation of any interim analyses and stopping guidelines                                                                                                                | Not applicable      |
| <b>Randomisation:</b>            |         |                                                                                                                                                                                             |                     |
| Sequence generation              | 8a      | Method used to generate the random allocation sequence                                                                                                                                      | 10                  |
|                                  | 8b      | Type of randomisation; details of any restriction (such as blocking and block size)                                                                                                         | 10                  |
| Allocation concealment mechanism | 9       | Mechanism used to implement the random allocation sequence (such as sequentially numbered containers), describing any steps taken to conceal the sequence until interventions were assigned | 10                  |
| Implementation                   | 10      | Who generated the random allocation sequence, who enrolled participants, and who assigned participants to interventions                                                                     | 10                  |
| Blinding                         | 11a     | If done, who was blinded after assignment to interventions (for example, participants, care providers, those                                                                                | 6,16                |

|    |                          |                                                                                                                     |                |
|----|--------------------------|---------------------------------------------------------------------------------------------------------------------|----------------|
| 1  |                          |                                                                                                                     |                |
| 2  |                          | assessing outcomes) and how                                                                                         |                |
| 3  |                          |                                                                                                                     |                |
| 4  |                          | 11b If relevant, description of the similarity of interventions                                                     | 7-11           |
| 5  | Statistical methods      | 12a Statistical methods used to compare groups for primary and secondary outcomes                                   | 12             |
| 6  |                          | 12b Methods for additional analyses, such as subgroup analyses and adjusted analyses                                | 12             |
| 7  |                          |                                                                                                                     |                |
| 8  | <b>Results</b>           |                                                                                                                     |                |
| 9  | Participant flow (a      | 13a For each group, the numbers of participants who were randomly assigned, received intended treatment, and        | 13,24          |
| 10 | diagram is strongly      | were analysed for the primary outcome                                                                               |                |
| 11 | recommended)             | 13b For each group, losses and exclusions after randomisation, together with reasons                                | 13,24          |
| 12 | Recruitment              | 14a Dates defining the periods of recruitment and follow-up                                                         | 7              |
| 13 |                          | 14b Why the trial ended or was stopped                                                                              | Not applicable |
| 14 |                          |                                                                                                                     |                |
| 15 | Baseline data            | 15 A table showing baseline demographic and clinical characteristics for each group                                 | 13,21          |
| 16 | Numbers analysed         | 16 For each group, number of participants (denominator) included in each analysis and whether the analysis was      | 24             |
| 17 |                          | by original assigned groups                                                                                         |                |
| 18 |                          |                                                                                                                     |                |
| 19 | Outcomes and             | 17a For each primary and secondary outcome, results for each group, and the estimated effect size and its           | 14,22,23       |
| 20 | estimation               | precision (such as 95% confidence interval)                                                                         |                |
| 21 |                          | 17b For binary outcomes, presentation of both absolute and relative effect sizes is recommended                     | Not applicable |
| 22 | Ancillary analyses       | 18 Results of any other analyses performed, including subgroup analyses and adjusted analyses, distinguishing       | 14             |
| 23 |                          | pre-specified from exploratory                                                                                      |                |
| 24 |                          |                                                                                                                     |                |
| 25 | Harms                    | 19 All important harms or unintended effects in each group (for specific guidance see CONSORT for harms)            | 12             |
| 26 |                          |                                                                                                                     |                |
| 27 | <b>Discussion</b>        |                                                                                                                     |                |
| 28 | Limitations              | 20 Trial limitations, addressing sources of potential bias, imprecision, and, if relevant, multiplicity of analyses | 16             |
| 29 | Generalisability         | 21 Generalisability (external validity, applicability) of the trial findings                                        | 14.15          |
| 30 | Interpretation           | 22 Interpretation consistent with results, balancing benefits and harms, and considering other relevant evidence    | 15             |
| 31 |                          |                                                                                                                     |                |
| 32 | <b>Other information</b> |                                                                                                                     |                |
| 33 | Registration             | 23 Registration number and name of trial registry                                                                   | 3              |
| 34 | Protocol                 | 24 Where the full trial protocol can be accessed, if available                                                      | 3              |
| 35 | Funding                  | 25 Sources of funding and other support (such as supply of drugs), role of funders                                  | 4              |
| 36 |                          |                                                                                                                     |                |

\*We strongly recommend reading this statement in conjunction with the CONSORT 2010 Explanation and Elaboration for important clarifications on all the items. If relevant, we also recommend reading CONSORT extensions for cluster randomised trials, non-inferiority and equivalence trials, non-pharmacological treatments, herbal interventions, and pragmatic trials. Additional extensions are forthcoming: for those and for up to date references relevant to this checklist, see [www.consort-statement.org](http://www.consort-statement.org).

1  
2  
3 **Comparison of Blood Pressure Measurement using an Automated Blood**  
4  
5 **Pressure Device in Community Pharmacies and Physicians' Offices: The**  
6  
7 **Collingwood-Creemore randomized controlled trial**  
8  
9

10  
11  
12 Larry W. Chambers, PhD, FCAHS

13  
14 Scientist, Bruyère Research Institute, a partnership of Bruyère

15  
16 Continuing Care and the University of Ottawa, Ottawa

17  
18 chambers@bruyere.org

19  
20  
21 Janusz Kaczorowski, PhD

22  
23 Professor & Research Director, the Docteur Sadok Besrouer Chair in

24  
25 Family Medicine and the GSK-CIHR Chair in Optimal Management of

26  
27 Chronic Disease, Department of Family and Emergency Medicine and the

28  
29 University of Montreal Hospital Research Centre (CRCHUM), University

30  
31 of Montreal, Montreal, Quebec.

32  
33 Susan O'Rielly MSc

34  
35 Dave Smith Youth Treatment Centre

36  
37 Sandra Ignagni PhD

38  
39 University of British Columbia

40  
41 Stephen J. C. Hearps, BPsyc PGDipPsyc

42  
43 Murdoch Childrens Research Institute, Melbourne, Australia  
44  
45  
46  
47  
48  
49  
50  
51  
52  
53  
54  
55  
56  
57  
58  
59  
60

**Abstract**

**Background:** Accurate measurement of blood pressure is the foundation of appropriate diagnosis, treatment and on-going management of hypertension. Automated blood pressure devices in community settings such as pharmacies provide opportunities for additional blood pressure measurement; however, it is important to ensure these measurements are comparable to those taken in the physicians' offices using the same devices. To assess whether blood pressure readings assessed with an automated device differed according to the setting in which they were taken, specifically in community pharmacies compared to physicians' offices, we conducted a randomized controlled trial.

**Methods:** Community dwelling adults aged 65 years and older, volunteer peer health educators, family physicians, and pharmacists in two mid-sized communities in Ontario, Canada participated in the trial. Five family physicians mailed invitations to their patients aged 65 years and older to participate in the trial. No other instructions, that might affect their blood pressure readings during the sessions were included in the letters to simplify the task and increase the number attending the sessions. Eligible and consenting adults were randomly allocated to one of two blood pressure measurement sequences: A.) physician's office/pharmacy/physician's office or B.) pharmacy/physician's office/pharmacy. Once in the family physician office or pharmacy, the participants were asked to be seated and be quiet before the blood pressure cuff was applied to their arm. Automated blood pressure devices (BpTRU) were used in both settings. Differences in mean Systolic Blood

1  
2  
3 Pressure (SBP) and Diastolic Blood Pressure (DBP) using automated  
4  
5 blood pressure measuring device were calculated comparing the setting  
6  
7 and sequence of the assessments.  
8

9  
10 **Results:** 275 adults completed the trial (mean age 75.9 years, 49.5%  
11  
12 male and 46.9% with self-reported diagnosis of hypertension). There  
13  
14 were no statistically significant differences in SBP or DBP associated  
15  
16 with the sequence or the setting. There was a significant difference  
17  
18 in the overall mean SBP between the two arms (122.0 versus 127.8 mmHg,  
19  
20  $p < .001$ ) which was most likely due to a statistical anomaly.  
21

22  
23 **Interpretation:** Measurements of blood pressure using an automated  
24  
25 device in a community pharmacy provide accurate and valid blood  
26  
27 pressure information that can be used in the diagnosis and management  
28  
29 of hypertension among community-dwelling older adults.  
30  
31

32  
33 Word count (abstract): 354  
34

35 Word count (text): 3104  
36

37 Trial Registration Number: [http://www.controlled-](http://www.controlled-trials.com/ISRCTN91799042)  
38  
39 [trials.com/ISRCTN91799042](http://www.controlled-trials.com/ISRCTN91799042)  
40  
41

42 **Corresponding author:**

43 Dr. Larry W. Chambers  
44

45 Bruyère Research Institute  
46

47 43 Bruyère Street  
48

49 Ottawa ON K1N 5C8 [www.bruyere.org/ebri](http://www.bruyere.org/ebri)  
50  
51

52 **Acknowledgements**  
53

54 The authors thank the family physicians, Drs. Harry O'Halloran, Ray  
55  
56 Bouchard, Anne Engell, Brad Nicholas, an Marie LaRose, and their staff  
57  
58  
59  
60

1  
2  
3 for their administrative support. We thank also Nilusha Premasinghe of  
4  
5 the Collingwood YMCA and Andrée Coté, with the Georgian Bay Family  
6  
7 Health Team, family medicine resident Tatania Adam for their  
8  
9 administrative support as well as the volunteer peer health educators.  
10  
11 This project was funded in part by the Canadian Stroke Network, a  
12  
13 National Centre of Excellence. All authors approved the final version  
14  
15 of the publication.  
16

17  
18 **Competing Interests**

19  
20 None  
21  
22  
23  
24  
25  
26  
27  
28  
29  
30  
31  
32  
33  
34  
35  
36  
37  
38  
39  
40  
41  
42  
43  
44  
45  
46  
47  
48  
49  
50  
51  
52  
53  
54  
55  
56  
57  
58  
59  
60

Confidential



## Introduction

The Canadian Health Measures Survey<sup>1</sup> results estimated that one fifth (19%) or 4.6 million Canadians have hypertension. Over 54% of stroke, 47% of ischemic heart disease, and 13.5% of all deaths worldwide are attributed to high blood pressure<sup>2-4</sup>. While blood pressure (BP) measurement is one of the most commonly performed tests in family practice, because of the inherent variability<sup>5</sup> of BP, the issues about where, by whom, and how it is measured remain paramount. Accuracy issues, which can be due to the equipment, the patient and the operator, include white coat hypertension, masked hypertension, night-time dippers versus non-dippers and extreme variability of blood pressure. The importance of accurate measurement of BP is further underscored by the fact that reductions in SBP >5mmHg or as small as 2-4 mmHg are clinically important. The average effect on blood pressure of a single antihypertensive drug at a standard dose or one lifestyle change can be as high as 10/6 mmHg<sup>6,7</sup>. The end result is that the measurement error frequently exceeds the effect size of therapy or lifestyle modification.

Because community pharmacies are frequent visiting sites for family medicine patients and as pharmacists are encouraged to monitor blood pressure as they counsel patients about their medications<sup>8</sup>, it is important that the BP measurement is accurate and reliable.

1  
2  
3 This trial was designed to determine if blood pressure measurements  
4  
5 taken in pharmacies are comparable to measurements in physician  
6  
7 offices.  
8  
9

## 11 **Methods**

### 13 *Study design*

14  
15  
16 This pragmatic randomized trial compared automated blood pressure  
17  
18 measurements of participants aged 65 years and over in family  
19  
20 physicians' offices and community pharmacies in Collingwood and  
21  
22 Creemore, Ontario, Canada. No renovations were made to the pharmacies  
23  
24 and the family physician offices to accommodate the trial so that the  
25  
26 patients were familiar with these surroundings in these small  
27  
28 communities where the pharmacies are geographically close to the  
29  
30 family physician offices. Participants in each group attended three  
31  
32 blood pressure assessment sessions to complete this parallel group  
33  
34 study. Important changes to the methods were not after the trial  
35  
36 commenced.  
37  
38  
39  
40

41 Eligible participants were randomly allocated to one of the following  
42  
43 two sequences (groups) for blood pressure assessment (see Figure 1):  
44

- 45 • Arm A= Physician's office, then pharmacy, then physician's office  
46  
47 or;  
48
- 49 • Arm B= Pharmacy, then physician's office, then pharmacy.  
50  
51

52 Participants were encouraged to complete three visits within four  
53  
54 weeks.  
55  
56  
57  
58  
59  
60

1  
2  
3 *Recruitment and training of local Trial coordinators*  
4

5 Two local coordinators were identified by the Cardiovascular Health  
6 Awareness Program<sup>9</sup> (CHAP) community lead organization (Collingwood  
7 YMCA) to oversee the blood pressure assessment sessions in the two  
8 communities. Local coordinators were briefed on the rationale and data  
9 collection procedures by the Coordinating Centre team during site  
10 visits to the two communities prior to study commencement. The  
11 Coordinating Centre team was available by telephone and e-mail for  
12 ongoing support to the local coordinators over the course of the  
13 trial. The trial's field activities began in April 2010 and ended in  
14 September 2010.  
15  
16  
17  
18  
19  
20  
21  
22  
23  
24  
25  
26  
27  
28

29 As in CHAP, the local coordinators were responsible for scheduling  
30 blood pressure assessment sessions and coordinating volunteer peer  
31 health educator schedules for each session. After each session, the  
32 local coordinators reviewed data collection forms of each participant  
33 for completeness and legibility prior to faxing the forms to the  
34 central database using fax-to-database technology. In addition, at  
35 week's end, data collection forms were mailed to the Centre.  
36  
37  
38  
39  
40  
41  
42  
43  
44  
45

46 *Recruitment of physicians and pharmacies*  
47

48 Two CHAP physicians agreed to participate and they recruited three  
49 additional physicians in Creemore. As a pragmatic trial, no other  
50 criteria were used to select physician offices. The Coordinating  
51 Centre team met with physicians and office staff to outline the  
52 rationale for the trial and their role. Two pharmacies, one in each  
53  
54  
55  
56  
57  
58  
59  
60

1  
2  
3 community, provided space for the blood pressure assessment sessions.  
4  
5 The Centre team outlined the rationale for the trial and pharmacies'  
6  
7 role. The pharmacies and the physicians' offices were offered leeway  
8  
9 so regular staff in all the sites could accommodate the day-to-day  
10  
11 operations the trial. As this is a pragmatic trial, no instructions  
12  
13 were given to the physicians and pharmacists about any treatments. The  
14  
15 assumption is that the randomization process results in balance in the  
16  
17 proportion of changes in medications that occurred with participants  
18  
19 in the two Arms of the trial.  
20  
21

#### 22 23 24 *Recruitment and training of volunteer peer health educators*

25  
26 With the assistance of the CHAP local lead organization (in this case  
27  
28 the local YMCA), the local Coordinators recruited 17 volunteer peer  
29  
30 health educators to assist with the blood pressure assessment  
31  
32 sessions. Using the CHAP Implementation Guide ([www.chaprogram.ca](http://www.chaprogram.ca)), a  
33  
34 community health nurse provided training for all the volunteers on the  
35  
36 process of assisting participants in using the automated blood  
37  
38 pressure measuring device ([www.bptru.com](http://www.bptru.com))<sup>6</sup> to appropriately assess  
39  
40 their blood pressure. The BpTRU automated blood pressure measuring  
41  
42 device meets international standards for accuracy and each machine is  
43  
44 the product of a high proficiency production process. The two  
45  
46 pharmacies involved in the trail each had a BpTRU device purchased by  
47  
48 CHAP. We have used BpTRU devices extensively and found them very  
49  
50 reliable and accurate. The inter-machine variability was not assessed.  
51  
52  
53  
54

#### 55 56 *Blood pressure assessment sessions*

57  
58  
59  
60

1  
2  
3 The local coordinator led and attended the pharmacy and physician's  
4 office blood pressure measurement sessions including scheduling  
5 involvement of the volunteers. At the first session, each participant  
6 signed a consent form and completed the CHAP cardiovascular risk  
7 profile questionnaire on the one page risk assessment form.  
8  
9 (www.chaprogram.ca). This form, completed on the first visit only,  
10 covered the participant's cardiovascular health history as well as  
11 risk factors such as weight, smoking history, physical activity,  
12 alcohol intake, stress and diet. In keeping with the BpTRU protocol,  
13 during the first visit and subsequent two visits, the BpTRU automated  
14 blood pressure measuring device independently assessed the blood  
15 pressure with volunteer peer health educators assisting with the cuff  
16 if required and assisting with recording the blood pressure taken by  
17 the BpTRU on the data collection form. The mean value of the five  
18 measurements as produced by the BpTRU was recorded on the  
19 participant's form by the volunteer. In CHAP, the BpTRU is set to have  
20 a one-minute interval between readings. During the remaining five  
21 BpTRU blood pressure measurements, the attending volunteer peer health  
22 educator or local Trial coordinator sat quietly nearby. The BpTRU used  
23 in this trial had an LED display readout and this information was  
24 recorded on the form at each session. Participants were discouraged  
25 from talking during the blood pressure assessment. A typical period of  
26 time required at a session was 20 minutes. Participants could consult  
27 the pharmacist as needed to discuss medications or other concerns. The  
28 Appendix provides the "CHAP Session Blood Pressure Recommendation  
29 Protocol" that the Volunteer Peer Health Educators referred to when  
30  
31  
32  
33  
34  
35  
36  
37  
38  
39  
40  
41  
42  
43  
44  
45  
46  
47  
48  
49  
50  
51  
52  
53  
54  
55  
56  
57  
58  
59  
60

1  
2  
3 assisting Trial participants once they had their blood pressure  
4  
5 reading. The data collection for this trial did not include keeping track of  
6  
7 the number of participants who fit into the categories of risk by BP levels  
8  
9 outlined in this Protocol.  
10

11  
12  
13 *Selection, randomization and recruitment of participants*  
14

15 Electronic health records of physician practice rosters were used to  
16  
17 generate lists of patients aged 65 years and older who were not in  
18  
19 hospital or residing in a long-term care facility. All participants  
20  
21 who met these criteria were eligible, regardless of their anticipated  
22  
23 risk, responsiveness, co-morbidities or past compliance. Age and gender  
24  
25 information on non-participants is not available as the physician  
26  
27 offices provided a list of names and addresses of patients who were 65  
28  
29 years of age and older with no other accompanying information.  
30  
31

32  
33  
34 Within each practice, patients were randomized to one of the two blood  
35  
36 pressure assessment sequences using random allocation sequence  
37  
38 generated by web-based randomization scheme at [www.randomizer.org](http://www.randomizer.org).  
39  
40 Patients were randomly allocated to one of two arms in the Trial, in  
41  
42 blocks of four to ensure a steady flow of patients arrived in the  
43  
44 pharmacies and the physicians' offices. Eligible patients were mailed  
45  
46 personalized invitation letters signed by their family physician. They  
47  
48 contained locations, dates and times of the blood pressure measurement  
49  
50 sessions and assigned location sequences. One quarter of the letters  
51  
52 were mailed at two week intervals to manage flow of participants at  
53  
54  
55  
56  
57  
58  
59  
60

1  
2  
3 sessions. Participants who did not attend after the first invitation  
4  
5 were sent another invitation.  
6  
7

#### 8 9 *Data collection and management*

10 A data collection form was completed for each visit. In order to  
11  
12 capture the order of allocated location sequences, the volunteers  
13  
14 recorded this on the back of the forms. Participants were encouraged  
15  
16 to take their copy of the completed form at each session to their next  
17  
18 visit with their family physician. Participants gave permission to  
19  
20 send a copy of the completed form to their family physician and their  
21  
22 regular pharmacist. Fax-to-database technology was used to forward  
23  
24 copies of the completed forms to the physicians, pharmacists and  
25  
26 central database. In addition, all the paper versions of the  
27  
28 completed, non-completed and illegible forms were forwarded to the  
29  
30 Coordinating Centre.  
31  
32  
33  
34  
35  
36

37 When completed forms arrived each week at the Coordinating Centre,  
38  
39 they were verified by SI for completeness as well as adherence to the  
40  
41 allocated sequence of local blood pressure assessments.  
42

43 These data were entered into Microsoft Excel by SI. SO checked a  
44  
45 random 10% sample of completed forms against what had been entered  
46  
47 into the database and did not find any data entry errors.  
48  
49  
50

#### 51 52 *Outcome Measure*

53 The primary outcome measure for the trial was the mean relative change  
54  
55 within participants in systolic blood pressure (SBP) and diastolic  
56  
57  
58  
59  
60

1  
2  
3 blood pressure (DBP) measurements using the BpTRU (comparing the  
4 setting for the assessment (pharmacy or physician office) and  
5 sequencing of the assessments (pharmacy first or physician office  
6 first, second or third).  
7  
8  
9  
10

#### 11 12 13 14 *Statistical Analysis*

15  
16 Using chi-square tests, participant characteristics in the two arms  
17 were compared based on responses to risk profile forms. Mean SBP and  
18 DBP obtained by the BpTRUs were compared by setting and sequence of  
19 the assessments using 2x3 repeated measures analysis of variance  
20 (ANOVA). Blood pressure mean differences in excess of 5 mmHg were  
21 considered clinically significant as this is the amount of decrease in  
22 blood pressure that is possible with anti-hypertension therapy.  
23  
24  
25  
26  
27  
28  
29

30 Correlations (Pearson  $r$ ) of blood pressure readings within Trial arms  
31 were calculated to determine between-setting BP consistency. Strong  
32 correlations were defined as those over 0.5. Two-tailed alpha level of  
33 0.05 was used to determine statistical significance, and all analyses  
34 were carried out using SPSS for Windows v.17.0.0. In order to test the  
35 hypothesis of equivalence, in other words blood pressure measurements  
36 taken at the pharmacy are equivalent to those taken in the physicians'  
37 offices (that is, a margin of +/- 7.5 mmHg), required 102 patients per  
38  
39  
40  
41  
42  
43  
44  
45  
46  
47  
48  
49  
50  
51  
52  
53  
54  
55  
56  
57  
58  
59  
60  
Trial arm.

52 The Research Ethics Board of Bruyère Continuing Care approved the  
53 study and all participants gave informed consent. There was minimal  
54 risk of harm to trial participants.  
55  
56  
57  
58  
59  
60



## Results

Invitation letters were mailed to 1,152 patients. Over 27% (315/1,152) agreed to participate and they were randomized to one of the two trial arms (Figure 1). Five participants were excluded from the analysis, two in Arm A and three in Arm B as they did not adhere to their assigned sequence of sites for blood pressure measurements. Twenty-two participants in Arm A and 13 participants in Arm B did not complete all three blood pressure assessments. The characteristics of these participants did not differ across arms and did not differ from participants. A total of 275 patients were enrolled and completed the trial (136 in Arm A; 139 in Arm B).

The characteristics of the participants in Arms A and B were comparable across most measures (Table 1). However, the two Arms differed for self-reported diagnosed with high blood pressure (A=44.4% and B=57.3%) and taking medication for high blood pressure (A=44.0% versus B=56.8%). Interviews with the pharmacy staff, physician office staff and the local trial coordinators by Coordinator Centre (SI) yielded no reasons to explain further this difference. The mean time interval to complete the three BP measurements for Arm A versus Arm B was comparable (Arm A = 11.1 days versus Arm B = 11.8 days,  $p=0.36$ ).

1  
2  
3 Mean SBP and DBP were comparable in both trial arms across  
4  
5 measurements taken at different settings (Table 2). Results of the  
6  
7 repeated measures ANOVA models showed no significant interaction  
8  
9 effect in differences between Arms or over time for either SBP or DBP.  
10  
11 The SBP ANOVA model also revealed a significant Arm main effect,  
12  
13 reflecting difference in the overall mean SBP between the two arms  
14  
15 (122.0 versus 127.8 mmHg,  $p < .001$ ), most likely due to higher  
16  
17 proportion of adults with self-reported high blood pressure in one arm  
18  
19 of the trial. The previous models were then rerun as repeated measures  
20  
21 analysis of co-variance. Adjusting for baseline differences in self-  
22  
23 report previous diagnosis of high blood pressure between the two Arms  
24  
25 revealed no model improvement, with a remaining significant main  
26  
27 effect between groups, a nonsignificant main effect over time, and a  
28  
29 nonsignificant interaction between groups over time.  
30  
31  
32  
33 Correlation coefficients comparing blood pressure readings for each  
34  
35 sequence and setting (labeled as One, Two or Three in Table 3) in Arms  
36  
37 A and B for both SBP and DBP were strong and consistent across  
38  
39 settings and the measurement sequence (i.e., all  $r > 0.5$ , Table 3).  
40  
41  
42

#### 43 **Discussion**

44  
45 As a pragmatic Trial<sup>11</sup>, this trial had simple participant eligibility  
46  
47 criteria with only patients in family physicians offices who were aged  
48  
49 65 and over being included. The intervention was flexible as the local  
50  
51 coordinators in Collingwood and Creemore had the latitude to operate  
52  
53 the sessions in the pharmacies and physician offices in a way that was  
54  
55 compatible with the other operations ongoing in these sites at the  
56  
57  
58  
59  
60

1  
2  
3 time of the trial. Also, the volunteer peer health educators were  
4  
5 trained in the usual way CHAP volunteers are trained and, like CHAP,  
6  
7 practicing practitioners in the study's family physician offices and  
8  
9 pharmacies were not provided with special training in hypertension  
10  
11 measurement, monitoring and management. The trial used the standard  
12  
13 CHAP data collection forms that capture blood pressure and other  
14  
15 cardiovascular disease risk information. No other special follow-up  
16  
17 data collection was conducted on study participants. Also, no special  
18  
19 strategies were used to increase participants' adherence to the  
20  
21 protocol. In the operation of CHAP, similarly there are no special  
22  
23 strategies to increase adherence as a letter from the family physician  
24  
25 usually results in over 25 percent of those receiving the letter  
26  
27 attending the CHAP sessions.  
28  
29  
30  
31  
32

33 As far as we know, only one other study<sup>12</sup> has been published comparing  
34  
35 blood pressure readings in pharmacies with readings in family  
36  
37 physician offices. In that study<sup>12</sup>, also, no clinically important  
38  
39 differences were reported in readings between the two sites. However,  
40  
41 the study, called the Palmera study, was designed more as an  
42  
43 explanatory study than a pragmatic study like the Collingwood Creemore  
44  
45 Trial. In order to enhance participating clinician adherence to the  
46  
47 protocol, only one experienced physician and one experienced  
48  
49 pharmacist who already worked in each site were responsible for all  
50  
51 the measurements and they were given 20 minutes of training to  
52  
53 standardize the blood pressure measuring process. As a cross-sectional  
54  
55 study, no attempt was made in the design of the trial to control a  
56  
57  
58  
59  
60

1  
2  
3 sequence effect - for example, did having blood pressure taken in the  
4 pharmacy first affect the readings in the physician office? Despite  
5 these differences between the Palmero<sup>12</sup> and Collingwood-Creemore  
6 studies, the results are consistent. In both cases, blood pressure  
7 measurements were comparable in each site thus supporting an increased  
8 role for pharmacies as appropriate additional sites to measure  
9 accurately and reliably BP and thus enhancing the prevention and  
10 control of cardiovascular disease beyond the physicians' office.  
11  
12  
13  
14  
15  
16  
17  
18  
19  
20

21  
22 Higher baseline mean blood pressure readings were found in Arm A when  
23 compared to Arm B. The pharmacists, physicians and their staff as well  
24 as the local trial coordinators could not provide any explanation for  
25 this difference. The groups were comparable on the other patient  
26 measures (see Table 1), suggesting that this was a chance event that  
27 can occur even when randomization is used to allocate participants.  
28 This is reflected in subsequent ANOVA models, adjusting for self-  
29 reported hypertension diagnosis, where the significant difference  
30 between groups in SBP was not removed. This further suggests that the  
31 mean blood pressure difference between the two arms was a statistical  
32 anomaly.  
33  
34  
35  
36  
37  
38  
39  
40  
41  
42  
43  
44  
45  
46  
47

48 The inability to blind participants is a common feature of pragmatic  
49 trials. Given the nature of our intervention (measuring BP in  
50 different settings), the likelihood of performance bias is quite low.  
51 As indicated above, the attrition rates were also low and not likely  
52 to influence the results of the trial.  
53  
54  
55  
56  
57  
58  
59  
60

1  
2  
3 The trial was successfully completed in five busy family physician  
4 offices and fully operational pharmacies. The day to day operation of  
5 the trial was the responsibility of local coordinators who were not  
6 researchers and employed by the local organization responsible for  
7 running the trial. They were not employed by the physicians or  
8 pharmacists. They had no interest in the results of the trial. It is  
9 likely that the order of the assessments as to whether they would be  
10 in the pharmacy or physician office was not an issue for the volunteer  
11 peer health educators or the participants as all participants would be  
12 assessed at least once in the family physician office as well as in  
13 the pharmacy. The local coordinators and the volunteer peer health  
14 educators were on a tight schedule as over 300 people had to be  
15 entered into the study and assessed three times, ideally, within four  
16 weeks. Very few did not complete the trial reflecting the excellent  
17 performance of the people in Collingwood and Creemore who were  
18 responsible for the day to day operation of the trial. The Trial  
19 Centre provided clear instructions about the allocation of  
20 participants to the two study groups. Visits to the trial location by  
21 Coordinating Centre personnel as well as frequent telephone  
22 conversations about the reason for the trial and the importance of  
23 adherence to the protocol also reduced the possibility of issues  
24 arising that might be due to the absence of blinding, but also  
25 guaranteed a high level of performance locally in conducting the trial  
26 and minimized attrition of participants in the trial, which, after  
27 all, had little benefit to the participants other than monitoring  
28 their blood pressure over a couple of weeks. As the Methods section  
29  
30  
31  
32  
33  
34  
35  
36  
37  
38  
39  
40  
41  
42  
43  
44  
45  
46  
47  
48  
49  
50  
51  
52  
53  
54  
55  
56  
57  
58  
59  
60

1  
2  
3 outlines, the assignments were checked by the Trial Centre as the  
4  
5 trial progressed. In addition, an independent assessment of 10% of the  
6  
7 participants assignment to the two Arms of the trial were reviewed to  
8  
9 confirm that they correctly has been assigned to one of the two Arms  
10  
11 of the trial. When interviewed about these issues at the end of the  
12  
13 trial, the local coordinators and the volunteers could not explain why  
14  
15 22 versus 13 participants in the two sequences did not complete the  
16  
17 trial. They also could not explain why the one Arm had slightly on  
18  
19 average higher blood pressure that the other Arm.  
20  
21

22  
23  
24 Future studies could be conducted using more complex study designs  
25  
26 including a fourth assessment, comparisons of blood pressure  
27  
28 measurements with a gold standard such as the ambulatory blood  
29  
30 pressure measurement, and comparisons of the extent of white coat and  
31  
32 masked hypertension that occurs in pharmacies and family physician  
33  
34 offices.  
35  
36

37 The evidence arising from this trial demonstrates that measurements of  
38  
39 blood pressure using an automated device in a community pharmacy can  
40  
41 provide accurate and valid blood pressure information to be used in  
42  
43 the diagnosis and management of hypertension among community-dwelling  
44  
45 older adults.  
46  
47  
48  
49  
50  
51  
52  
53  
54  
55  
56  
57  
58  
59  
60

## References

1. Statistics Canada. Canadian Health Measures Survey: Blood pressure in adults 2007-2009. Date Modified: 2011-07-05.  
<http://www.statcan.gc.ca/daily-quotidien/100217/dq100217b-eng.htm#tphp>  
(accessed July 5, 2012).
2. Rodgers A, Ezzati M, Vander Hoorn S, Lopez AD, Lin R-B, Murray CJL, Comparative Risk Assessment Group. Distribution of major health risks: Findings from the Global Burden of Disease Study. *PLoS Medicine* 2004;1(1)44-55.
3. Lawes C, Hoorn SV, Law MR, Elliott P, MacMahon S, Rodgers A. Blood pressure and the global burden of disease 2000. Part II: Estimates of attributable burden. *Journal of Hypertension* 2006;24(3):423-430.
4. Lawes C, Hoorn SV, Rodgers A. Global burden of blood-pressure-related disease. *The Lancet* 2008;371(9623):1513-1518.
5. Bancej CM, Campbell N, McKay DW, Nichol M, Walker RL, Kaczorowski J. Home blood pressure monitoring among Canadian adults with hypertension: Results from the 2009 survey on living with chronic diseases in Canada. *Canadian Journal of Cardiology* 2010;26(5):e152-e157.
6. Myers MG, Godwin M, Dawes M, Kiss A, Tobe SW, Grant FC, Kaczorowski J. Conventional versus automated measurement of blood pressure in primary care patients with systolic hypertension: randomised parallel design controlled trial. *BMJ* 2011 Feb 7;342:d286. doi:  
10.1136/bmj.d286.

- 1  
2  
3 7. Myers MG, Godwin M, Dawes M, Kiss A, Tobe SW, Kaczorowski J.  
4  
5 Measurement of blood pressure in the office: recognizing the problem  
6  
7 and proposing the solution. *Hypertension* 2010 Feb;55(2):195-200.  
8  
9  
10 8. Brown D, Portlock J, Rutter P. Review of services provided by  
11  
12 pharmacies that promote healthy living. *Int J Clin Pharm* 2012;34:399-  
13  
14 409  
15  
16 9. Kaczorowski J, Chambers LW, Dolovich L, Paterson JM, Karwalajtys T,  
17  
18 Gierman T, Farrell B, McDonough B, Thabane L, Tu K, Zagorski B, Goeree  
19  
20 R, Levitt C, Hogg W, Laryea S, Carter M, Cross D, Sebaldt JR.  
21  
22 Improving cardiovascular health at the population level: A 39  
23  
24 community cluster-randomized trial of the Cardiovascular Health  
25  
26 Awareness Program (CHAP). *BMJ* 2011;342:d44211.  
27  
28  
29 10. Karwalajtys T, Kaczorowski J, Hutchison B, Myers MG, Sullivan SM,  
30  
31 Chambers LW, Lohfeld L, for the CHAP Working Group. Blood pressure  
32  
33 variability and prevalence of hypertension using automated readings  
34  
35 from multiple visits to a pharmacy-based community-wide program.  
36  
37 *Journal of Human Hypertension* 2009;23(9):585-589  
38  
39  
40 11. Thorpe KE, Zwarenstein M, Oxman AD, Treweek S, Furberg CD,  
41  
42 Altman DG, Tunis S, Bergel E, Harvey I, Magid DJ, Chalkidou K. A  
43  
44 pragmatic-explanatory continuum indicator summary  
45  
46 (PRECIS): a tool to help trial designers. *CMAJ* 2009;180(10):E47-E57  
47  
48  
49 12. Sendra-Lillo J, Sabeter-Hernandez D, Sendra-Ortola A, Martinez-  
50  
51 Martinez F. Agreement between community pharmacy, physician's office  
52  
53 and home blood pressure measurement methods: The Palmera Study.  
54  
55 *American Journal of Hypertension* 2012;25(3):290-296  
56  
57  
58  
59  
60



1  
2  
3  
4  
5  
6  
7  
8  
9  
10  
11  
12  
13  
14  
15  
16  
17  
18  
19  
20  
21  
22  
23  
24  
25  
26  
27  
28  
29  
30  
31  
32  
33  
34  
35  
36  
37  
38  
39  
40  
41  
42  
43  
44  
45  
46  
47  
48  
49  
50  
51  
52  
53  
54  
55  
56  
57  
58  
59  
60

Confidential

**Table 1 Baseline characteristics of Collingwood-Creemore Trial participants**

|                                           | Arm A       | Arm B        |
|-------------------------------------------|-------------|--------------|
|                                           | (O, Ph, O)* | (Ph, O, Ph)* |
|                                           | n=136       | n=139        |
| Characteristic (self-reports)             | M (SD)      | M (SD)       |
| Age                                       | 75.9 (6.5)  | 75.9 (6.8)   |
|                                           | % (n)       | % (n)        |
| Sex (male)                                | 51.5 (70)   | 47.5 (66)    |
| History of transient ischemic attacks     | 9.6 (13)    | 9.4 (13)     |
| History of stroke                         | 3.7 (5)     | 3.6 (5)      |
| History of heart attack                   | 7.4 (10)    | 11.5 (16)    |
| Diagnosed with diabetes                   | 10.3 (14)   | 10.9 (15)    |
| Diagnosed with high blood pressure        | 44.4 (60)   | 57.3 (79)    |
| Taking medication for high blood pressure | 43.0 (59)   | 56.8 (80)    |

\*O=Physician Office, Ph=Pharmacy

1  
2  
3 **Table 2 Mean blood pressure readings in the Collingwood-Creemore Trial**  
4  
5  
6

7

| 8  | Systolic Blood                   | Diastolic Blood               |
|----|----------------------------------|-------------------------------|
| 9  | Pressure                         | Pressure                      |
| 10 | (mmHg)                           | (mmHg)                        |
| 11 | M (SD)                           | M (SD)                        |
| 12 | Assessment                       |                               |
| 13 | <hr/>                            |                               |
| 14 | <b>Arm A (O, Ph, O)*,</b>        |                               |
| 15 | n=136                            |                               |
| 16 | Assessment 1 (O)                 | 122.5 (14.6)      70.2 (9.4)  |
| 17 | Assessment 2 (Ph)                | 121.8 (14.1)      70.1 (8.3)  |
| 18 | Assessment 3 (O)                 | 121.8 (14.3)      69.6 (9.3)  |
| 19 | <br>                             |                               |
| 20 | <b>Arm B (Ph, O Ph)*,</b>        |                               |
| 21 | n=139                            |                               |
| 22 | Assessment 1 (Ph)                | 128.7 (17.0)      70.5 (10.2) |
| 23 | Assessment 2 (O)                 | 127.6 (17.0)      70.1 (9.9)  |
| 24 | Assessment 3 (Ph)                | 127.6 (16.5)      69.8 (10.8) |
| 25 | <hr/>                            |                               |
| 26 | *O=Physician Office, Ph=Pharmacy |                               |

27  
28  
29  
30  
31  
32  
33  
34  
35  
36  
37  
38  
39  
40  
41  
42  
43  
44  
45  
46  
47  
48  
49  
50  
51  
52  
53  
54  
55  
56  
57  
58  
59  
60

1  
2  
3  
4  
5  
6  
7  
8  
9  
10  
11  
12  
13  
14  
15  
16  
17  
18  
19  
20  
21  
22  
23  
24  
25  
26  
27  
28  
29  
30  
31  
32  
33  
34  
35  
36  
37  
38  
39  
40  
41  
42  
43  
44  
45  
46  
47  
48  
49  
50  
51  
52  
53  
54  
55  
56  
57  
58  
59  
60

**Table 3 Correlation coefficients comparing sequences/settings (1, 2 and 3) of blood pressure measurements in the Collingwood-Creemore Trial**

|  | Arm A       |      |      | Arm B        |      |      |
|--|-------------|------|------|--------------|------|------|
|  | (O, Ph, O)* |      |      | (Ph, O, Ph)* |      |      |
|  | n=136       |      |      | n=139        |      |      |
|  | <hr/>       |      |      | <hr/>        |      |      |
|  | Systolic    | 2    | 3    | Systolic     | 2    | 3    |
|  | 1           | 0.55 | 0.61 | 1            | 0.64 | 0.61 |
|  | 2           | --   | 0.55 | 2            | --   | 0.56 |
|  | Diastolic   | 2    | 3    | Diastolic    | 2    | 3    |
|  | 1           | 0.63 | 0.72 | 1            | 0.66 | 0.71 |
|  | 2           | --   | 0.57 | 2            | --   | 0.62 |

\*O=Physician Office, Ph=Pharmacy

Figure 1: Collingwood-Creemore Pharmacy versus Physician Office

## Randomized Controlled Trial Flow Diagram

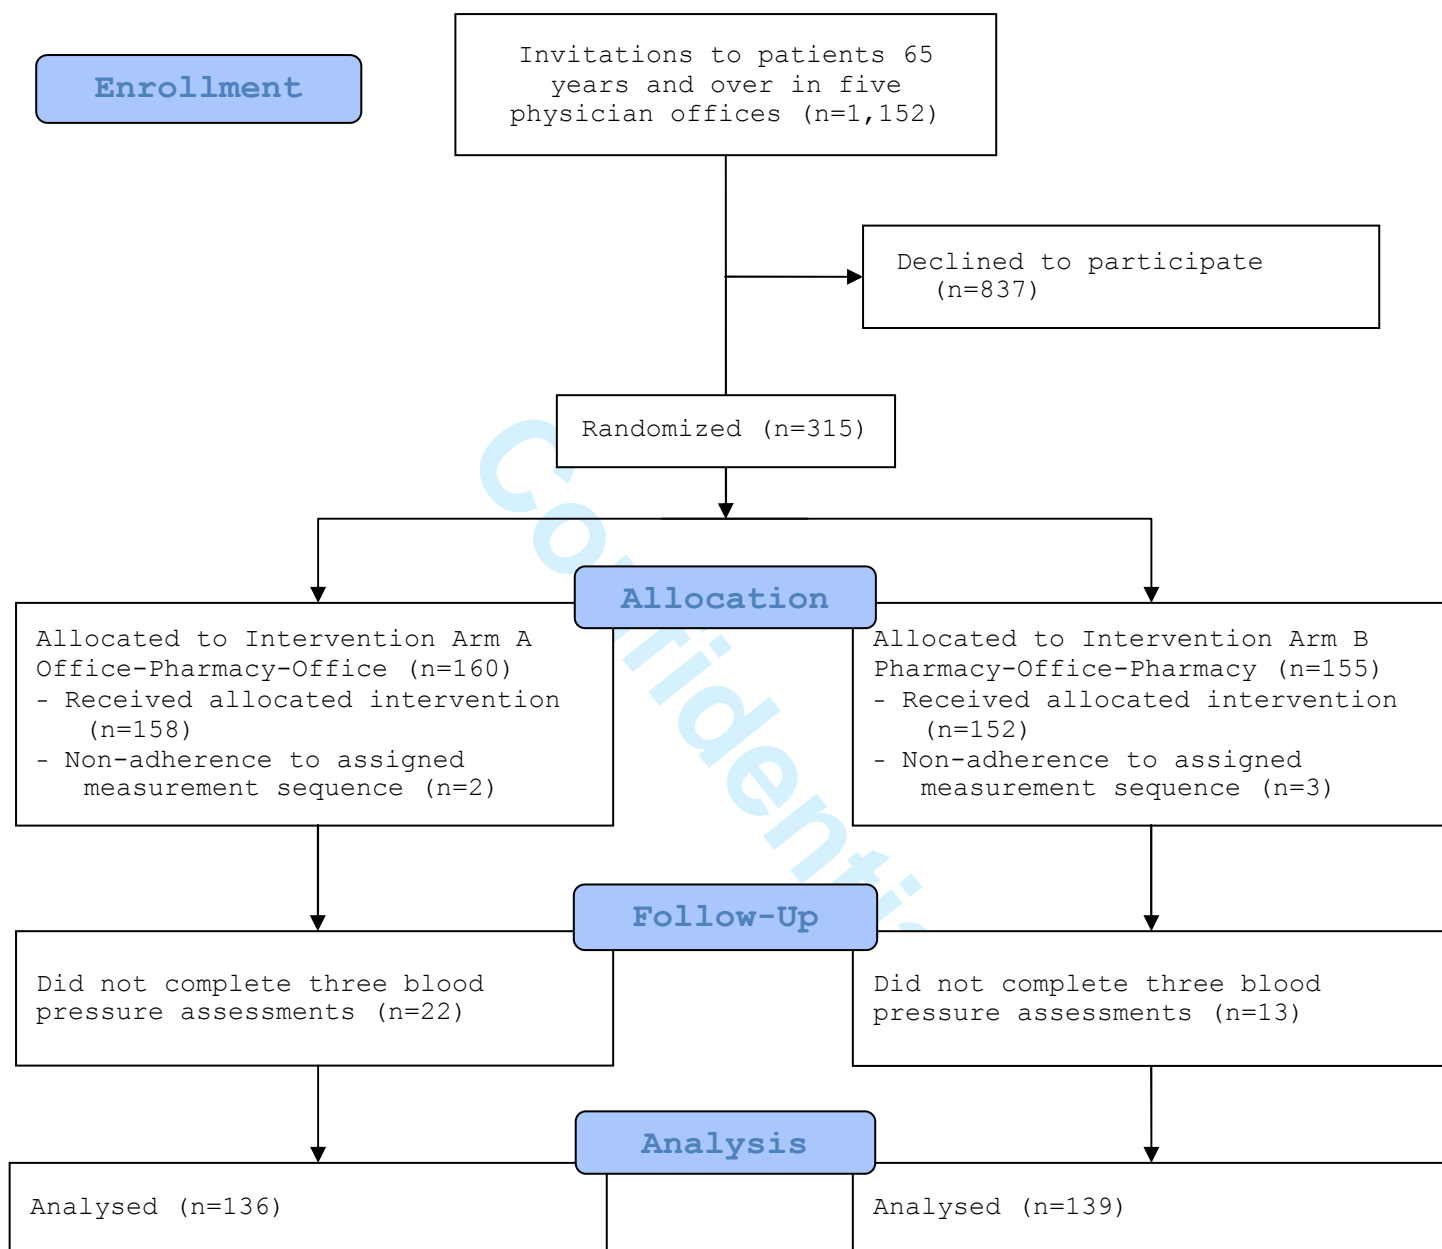

## CHAP Session Blood Pressure Recommendation Protocol

Community Name: \_\_\_\_\_

| Systolic (mm Hg)                                                                                                                    | Diastolic (mm Hg) | Definition (NOT DIAGNOSIS)                                                                          | Required Recommendation(s) / Action(s)                                                                                                                                                                                                                                                                                                                                                                                                                                                                            | Additional Recommendations                                                                                                                                                                                                                                                                                                             |
|-------------------------------------------------------------------------------------------------------------------------------------|-------------------|-----------------------------------------------------------------------------------------------------|-------------------------------------------------------------------------------------------------------------------------------------------------------------------------------------------------------------------------------------------------------------------------------------------------------------------------------------------------------------------------------------------------------------------------------------------------------------------------------------------------------------------|----------------------------------------------------------------------------------------------------------------------------------------------------------------------------------------------------------------------------------------------------------------------------------------------------------------------------------------|
| <90                                                                                                                                 | <60               | Low                                                                                                 | If symptoms present (e.g. dizziness):<br><ul style="list-style-type: none"> <li>- Nurse alerted → assessment + follow-up</li> <li>- Session Pharmacist may be alerted and a MedsCheck appointment</li> <li>- Consider booking a consultation or MedsCheck appointment with Regular or Session Pharmacist</li> </ul>                                                                                                                                                                                               | <ul style="list-style-type: none"> <li>- Review educational materials and consider following-up with CHAP session referrals and suggested community resources</li> <li>- Discuss with Family Physician at next visit</li> <li>- Consider booking a consultation or MedsCheck appointment with Regular or Session Pharmacist</li> </ul> |
| 90-129                                                                                                                              | 60-79             | Normal                                                                                              | <ul style="list-style-type: none"> <li>- Option to return for another CHAP session to discuss modifiable risk factors with Peer Health Educator</li> </ul>                                                                                                                                                                                                                                                                                                                                                        |                                                                                                                                                                                                                                                                                                                                        |
| 130-139                                                                                                                             | 80-89             | High Normal                                                                                         | If diabetes or other cardiovascular risk factors present:<br><ul style="list-style-type: none"> <li>- Attend another CHAP session for reassessment and discussion with Peer Health Educator</li> </ul> If BP >130/80 on re-assessment:<br><ul style="list-style-type: none"> <li>- Make appointment with Family Physician</li> </ul>                                                                                                                                                                              |                                                                                                                                                                                                                                                                                                                                        |
| 140+                                                                                                                                | 90+               | <b>Hypertensive range – Lifestyle modification and/or antihypertensive medication may be needed</b> |                                                                                                                                                                                                                                                                                                                                                                                                                                                                                                                   |                                                                                                                                                                                                                                                                                                                                        |
| 140-159                                                                                                                             | 90-99             | Stage 1 – mild                                                                                      | <ul style="list-style-type: none"> <li>- Attend another CHAP session for reassessment and discussion with Peer Health Educator</li> </ul> If BP >140/90 on re-assessment:<br><ul style="list-style-type: none"> <li>- Make appointment with Family Physician</li> </ul>                                                                                                                                                                                                                                           |                                                                                                                                                                                                                                                                                                                                        |
| 160-179                                                                                                                             | 100-109           | Stage 2 – moderate                                                                                  | <ul style="list-style-type: none"> <li>- Data form faxed to Family Physician TODAY</li> <li>- Attend another CHAP session for reassessment and discussion with Peer Health Educator</li> <li>- See Regular Pharmacist (may be Session Pharmacist); a consultation or MedsCheck appointment may be booked</li> </ul> If BP > 160/100 on re-assessment:<br><ul style="list-style-type: none"> <li>- Make appointment with Family Physician</li> </ul>                                                               |                                                                                                                                                                                                                                                                                                                                        |
| 180-209                                                                                                                             | 110-119           | Stage 3 – severe                                                                                    | <ul style="list-style-type: none"> <li>- Nurse alerted → assessment + follow-up</li> <li>- Nurse to CALL Family Physician today to ensure patient is followed-up</li> <li>- Data form faxed to Family Physician TODAY</li> <li>- Session Pharmacist may be alerted; a consultation or MedsCheck appointment may be booked with Regular Pharmacist</li> <li>- See Family Physician as soon as possible</li> <li>- Attend another CHAP session for reassessment and discussion with Peer Health Educator</li> </ul> |                                                                                                                                                                                                                                                                                                                                        |
| 210+                                                                                                                                | 120+              | Stage 4 – very severe                                                                               | <ul style="list-style-type: none"> <li>- Nurse alerted → assessment + follow-up</li> <li>- Nurse to CALL Family Physician immediately for urgent appointment; if FP not available, send to Emergency</li> <li>- Data form faxed to Family Physician TODAY;</li> <li>- Session Pharmacist may be alerted; a consultation or MedsCheck appointment may be booked with Regular Pharmacist</li> </ul>                                                                                                                 |                                                                                                                                                                                                                                                                                                                                        |
| <b>BP READING AT SESSION</b>                                                                                                        |                   |                                                                                                     | <b>FOLLOW-UP RECOMMENDATION</b>                                                                                                                                                                                                                                                                                                                                                                                                                                                                                   |                                                                                                                                                                                                                                                                                                                                        |
| NOTE: If systolic and diastolic pressures fall in different ranges, the <u>higher</u> range is used; e.g. 165 / 90 mm Hg = Stage 2. |                   |                                                                                                     | NOTE: A Peer Health Educator typically discusses follow-up recommendation with participant, unless involvement of Nurse and/or Pharmacist is indicated, or participant has additional questions/concerns.<br>The on-call Community Nurse or Session Pharmacist may be contacted at any time by the Peer Health Educator with questions/concerns relating to any participant.<br>Participants will receive targeted health education materials / information about local resources / appropriate referrals.        |                                                                                                                                                                                                                                                                                                                                        |

## Rationale for CHAP Session Blood Pressure Recommendations

| Recommendation / Action                                                                        | Rationale                                                                                                                                                                                                                                                                                                                                                                                                                                                                                                                                                                                                                                                                                                             |
|------------------------------------------------------------------------------------------------|-----------------------------------------------------------------------------------------------------------------------------------------------------------------------------------------------------------------------------------------------------------------------------------------------------------------------------------------------------------------------------------------------------------------------------------------------------------------------------------------------------------------------------------------------------------------------------------------------------------------------------------------------------------------------------------------------------------------------|
| <b>CHAP Session</b>                                                                            |                                                                                                                                                                                                                                                                                                                                                                                                                                                                                                                                                                                                                                                                                                                       |
| - Attend another CHAP session for reassessment and discussion with Peer Health Educator        | <ul style="list-style-type: none"> <li>- Blood pressure fluctuates naturally</li> <li>- Multiple blood pressure readings using an accurate device provide more complete and accurate information for your doctor</li> <li>- Volunteer Peer Health Educators can provide support with modifiable risk factors by reviewing your CHAP risk profile recording form and Heart and Stroke Blood Pressure Action Plan™, discussing priorities and strategies for addressing risk factors and providing helpful resources/referrals</li> </ul>                                                                                                                                                                               |
| <b>Appointment with Family Physician</b>                                                       |                                                                                                                                                                                                                                                                                                                                                                                                                                                                                                                                                                                                                                                                                                                       |
| - Make appointment with Family Physician                                                       | <ul style="list-style-type: none"> <li>- Your doctor knows your health history and can diagnose high blood pressure or make changes to keep your blood pressure under control</li> <li>- High blood pressure is often diagnosed over several visits, and is monitored regularly by your family doctor</li> </ul>                                                                                                                                                                                                                                                                                                                                                                                                      |
| - See Family Physician <u>as soon as possible</u>                                              | <ul style="list-style-type: none"> <li>- When blood pressure is very elevated, you may be at risk of serious health problems; your doctor will need to diagnose high blood pressure and/or make changes to keep your blood pressure under control</li> </ul>                                                                                                                                                                                                                                                                                                                                                                                                                                                          |
| <b>Pharmacist and MedsCheck Appointment</b>                                                    |                                                                                                                                                                                                                                                                                                                                                                                                                                                                                                                                                                                                                                                                                                                       |
| - See Regular Pharmacist (may be Session Pharmacist) and a MedsCheck appointment may be booked | <ul style="list-style-type: none"> <li>- Your regular pharmacist is aware of your prescriptions and can identify drug-related problems that can contribute to hypertension</li> <li>- Your pharmacist can also help with questions about side effects and taking your antihypertensive medication(s) regularly</li> <li>- The MedsCheck appointment is an annual 30 minute discussion with your pharmacist about how your medications may be affecting each other               <ul style="list-style-type: none"> <li>▪ Participants who are currently taking three or more prescriptions are eligible</li> <li>▪ For more information call the INFOline 1-866-255-6701 or TTY 1-800-387-5559</li> </ul> </li> </ul> |
| - Session Pharmacist may be alerted and a MedsCheck appointment may be booked                  | <ul style="list-style-type: none"> <li>- The session pharmacist can provide <u>on-site</u> assessment of potential drug-related problems that can contribute to hypertension</li> </ul>                                                                                                                                                                                                                                                                                                                                                                                                                                                                                                                               |
| <b>Nurse</b>                                                                                   |                                                                                                                                                                                                                                                                                                                                                                                                                                                                                                                                                                                                                                                                                                                       |
| - Nurse alerted → assessment + follow-up                                                       | <ul style="list-style-type: none"> <li>- The program nurse will do a brief on-site health assessment and blood pressure measurement, to confirm elevated blood pressure and determine necessary care</li> <li>- Depending on results, the nurse may call your doctor right away or later today to ensure follow-up</li> <li>- If you require urgent care and your doctor is not available, you will be sent to Emergency</li> </ul>                                                                                                                                                                                                                                                                                   |
| <b>Risk Profile Data Form</b>                                                                  |                                                                                                                                                                                                                                                                                                                                                                                                                                                                                                                                                                                                                                                                                                                       |
| - Data form faxed to Family Physician TODAY                                                    | <ul style="list-style-type: none"> <li>- The CHAP data form provides your doctor with new information that can be used in managing your blood pressure at your next visit or right away</li> </ul>                                                                                                                                                                                                                                                                                                                                                                                                                                                                                                                    |
